# Supplementary material
Source: HighWire-hosted journal article supplement (https://bjsm.bmj.com/content/54/24/1482)
Supplement: inline-supplementary-material-3 [file inline-supplementary-material-3.pdf]

Table 5: Descriptive statistics of variables used in the regression models.

| <b>Variable</b>                               | <b>Mean</b> | <b>Std. dev.</b> |
|-----------------------------------------------|-------------|------------------|
| Gender: female (yes/no)                       | 0.55        | 0.50             |
| Age (years)                                   | 37.0        | 10.6             |
| Ethnicity: white (yes/no)                     | 0.44        | 0.50             |
| Ethnicity: Asian (yes/no)                     | 0.34        | 0.47             |
| Ethnicity: black (yes/no)                     | 0.01        | 0.08             |
| Bullying (yes/no)                             | 0.03        | 0.16             |
| Time pressure (yes/no)                        | 0.14        | 0.35             |
| Stress (yes/no)                               | 0.10        | 0.30             |
| Carer of child (yes/no)                       | 0.28        | 0.45             |
| Carer of ill family member or friend (yes/no) | 0.09        | 0.29             |
| Volunteering (yes/no)                         | 0.31        | 0.46             |
| Travel time (minutes)                         | 45.3        | 34.3             |
| Financial concerns (yes/no)                   | 0.15        | 0.35             |
| Physical health: good (yes/no)                | 0.72        | 0.45             |
| BMI: underweight (yes/no)                     | 0.04        | 0.20             |
| BMI: overweight (yes/no)                      | 0.03        | 0.17             |
| BMI: obese (yes/no)                           | 0.16        | 0.37             |
| Smoking (yes/no)                              | 0.10        | 0.30             |
| Excessive alcohol consumption (yes/no)        | 0.16        | 0.36             |
| High blood pressure (yes/no)                  | 0.23        | 0.42             |
| High cholesterol (yes/no)                     | 0.04        | 0.19             |
| High glucose (yes/no)                         | 0.02        | 0.12             |
| Mental health: good (yes/no)                  | 0.68        | 0.47             |
| Psychological distress (yes/no)               | 0.07        | 0.26             |
| Sleep disturbance score                       | 10.6        | 2.17             |
| Poor sleep quality (yes/no)                   | 0.47        | 0.50             |
| Sleep problem (yes/no)                        | 0.16        | 0.37             |
| Difficulty falling asleep (yes/no)            | 0.12        | 0.33             |
| Sleep was not refreshing (yes/no)             | 0.28        | 0.40             |
| First uninterrupted sleep period (hours)      | 4.34        | 2.07             |
| Less than 6 hours                             | 0.37        | 0.48             |
| More than 9 hours                             | 0.01        | 0.08             |
| Hours of sleep                                | 6.77        | 1.06             |
| Asthma (yes/no)                               | 0.05        | 0.23             |
| Cardiovascular disease (yes/no)               | 0.01        | 0.11             |
| Cancer (yes/no)                               | 0.00        | 0.07             |
| Diabetes (yes/no)                             | 0.02        | 0.14             |
| Hypertension (yes/no)                         | 0.06        | 0.23             |
| Kidney disease (yes/no)                       | 0.01        | 0.08             |
| Severe Mental Illness (yes/no)                | 0.03        | 0.17             |
| Work impairment %: absence + presenteeism     | 0.10        | 0.20             |
| Work impairment %: absence                    | 0.02        | 0.08             |
| Work impairment %: presenteeism               | 0.08        | 0.17             |
